# Supplementary material
Source: HighWire-hosted journal article supplement (https://ajnr-sso.highwirestaging.com/highwire/filestream/55495/field_highwire_adjunct_files/0/17-00162.pdf)
Supplement: 17-00162.pdf [file 17-00162.pdf]

**On-line Table: Definite, probable, and definite or probable (total) changes in various MRI findings during a 12-week period in subjects and controls**

| MRI Findings                        | Proportion of Participants in Whom MRI Findings Changed during the 12-Week Follow-Up |               |                      |                   |               |                      | Difference: Subject (%), Control (%) <sup>a</sup> | Odds Ratios (95% CI) <sup>a</sup> and P Value |
|-------------------------------------|--------------------------------------------------------------------------------------|---------------|----------------------|-------------------|---------------|----------------------|---------------------------------------------------|-----------------------------------------------|
|                                     | Controls                                                                             |               |                      | Subjects with LBP |               |                      |                                                   |                                               |
|                                     | Probable                                                                             | Definite      | Definite or Probable | Probable          | Definite      | Definite or Probable |                                                   |                                               |
| Any MRI finding                     | 5/10<br>= 50%                                                                        | 3/10<br>= 30% | 8/10<br>= 80%        | 8/20<br>= 40%     | 9/20<br>= 45% | 17/20<br>= 85%       | 5%                                                | 1.4 (0.2–10.2)<br>P = 1.00                    |
| Disc degeneration                   | 1/10<br>= 10%                                                                        | 0/10<br>= 0%  | 1/10<br>= 10%        | 2/20<br>= 10%     | 0/20<br>= 0%  | 2/20<br>= 10%        | 0%                                                | 1.0 (0.1–12.6)<br>P = 1.00                    |
| Disc signal intensity               | 1/10<br>= 10%                                                                        | 0/10<br>= 0%  | 1/10<br>= 10%        | 2/20<br>= 10%     | 0/20<br>= 0%  | 2/20<br>= 10%        | 0%                                                | 1.0 (0.1–12.6)<br>P = 1.00                    |
| Disc height                         | 1/10<br>= 10%                                                                        | 0/10<br>= 0%  | 1/10<br>= 10%        | 0/20<br>= 0%      | 0/20<br>= 0%  | 0/20<br>= 0%         | −10%                                              | Unable to calculate <sup>b</sup><br>P = .33   |
| HIZ                                 | 2/10<br>= 20%                                                                        | 2/10<br>= 20% | 4/10<br>= 40%        | 4/20<br>= 20%     | 4/20<br>= 20% | 8/20<br>= 40%        | 0%                                                | 1.0 (0.2–4.7)<br>P = 1.00                     |
| Annular fissure                     | 0/10<br>= 0%                                                                         | 1/10<br>= 10% | 1/10<br>= 10%        | 2/20<br>= 10%     | 3/20<br>= 15% | 5/20<br>= 25%        | 15%                                               | 3.0 (0.3–29.9)<br>P = .63                     |
| Modic changes                       | 2/10<br>= 20%                                                                        | 0/10<br>= 0%  | 2/10<br>= 20%        | 2/20<br>= 10%     | 1/20<br>= 5%  | 3/20<br>= 15%        | −5%                                               | 0.7 (0.1–5.1)<br>P = 1.00                     |
| Disc herniation                     | 2/10<br>= 20%                                                                        | 1/10<br>= 10% | 3/10<br>= 30%        | 8/20<br>= 40%     | 5/20<br>= 25% | 13/20<br>= 65%       | 35%                                               | 4.3 (0.8–22.2)<br>P = .12                     |
| Facet joint arthropathy             | 0/10<br>= 0%                                                                         | 0/10<br>= 0%  | 0/10<br>= 0%         | 0/20<br>= 0%      | 0/20<br>= 0%  | 0/20<br>= 0%         | 0%                                                | Unable to calculate <sup>b</sup>              |
| Central canal stenosis              | 0/10<br>= 0%                                                                         | 0/10<br>= 0%  | 0/10<br>= 0%         | 0/20<br>= 0%      | 0/20<br>= 0%  | 0/20<br>= 0%         | 0%                                                | Unable to calculate <sup>b</sup>              |
| Spondylolisthesis or retrolisthesis | 0/10<br>= 0%                                                                         | 0/10<br>= 0%  | 0/10<br>= 0%         | 0/20<br>= 0%      | 0/20<br>= 0%  | 0/0%<br>= 0%         | 0%                                                | Unable to calculate <sup>b</sup>              |
| Edema                               | 1/10<br>= 10%                                                                        | 0/10<br>= 0%  | 1/10<br>= 10%        | 0/20<br>= 0%      | 0/20<br>= 0%  | 0/20<br>= 0%         | −10%                                              | Unable to calculate <sup>b</sup><br>P = .33   |
| Nerve root compromise               | 0/10<br>= 0%                                                                         | 0/10%<br>= 0% | 0/10<br>= 0%         | 3/20%<br>= 15%    | 0/20%<br>= 0% | 3/20%<br>= 15%       | 15%                                               | Unable to calculate <sup>b</sup><br>P = .53   |

<sup>a</sup> Based on definite or probable values for subjects and controls.

<sup>b</sup> Odds ratio unable to be calculated due to cells with zero count score.
